# Supplementary material for: Efficient heterojunction constructed from wide-bandgap and narrow-bandgap small molecules enables dual-band absorption transparent photovoltaics
Source: Royal Society of Chemistry journal article supplement (doi:10.1039/d3ta05815h), 2023-01-01
Supplement: d3ta05815h1.pdf [file d3ta05815h1.pdf]

## Supporting Information

# Efficient Heterojunction Constructed by Wide-Bandgap and Narrow-Bandgap Small Molecules Enables Dual-Band Absorption Transparent Photovoltaics

*Ruiqian Meng<sup>1,2,3‡</sup>, Ze Qiao<sup>1,2‡</sup>, Qianqing Jiang<sup>1,2</sup>, Dianyuan Liu<sup>1,2,3\*</sup>*

<sup>1</sup> Key Laboratory of 3D Micro/nano Fabrication and Characterization of Zhejiang Province, School of Engineering, Westlake University, Hangzhou, Zhejiang 310030, China.

<sup>2</sup> Institute of Advanced Technology, Westlake Institute for Advanced Study, Hangzhou, Zhejiang 310024, China.

<sup>3</sup> Zhejiang University, Hangzhou, Zhejiang 310027, China.

a

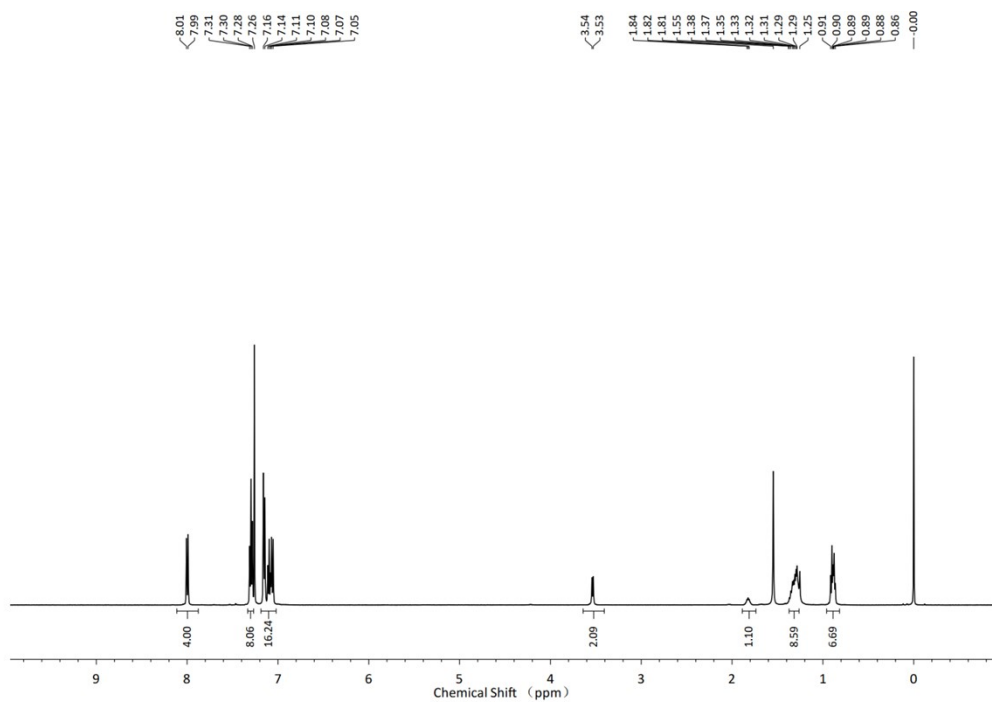

$^1\text{H}$  NMR spectrum of TPD-2TPA ( $\text{CDCl}_3$ , 500 MHz)

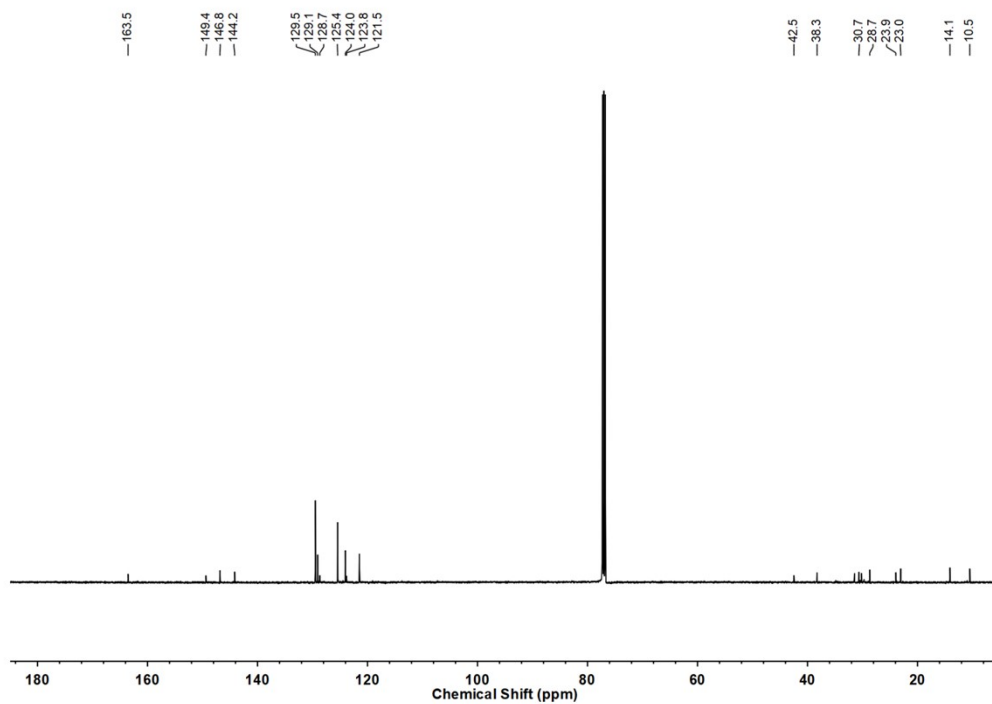

$^{13}\text{C}$  NMR spectrum of TPD-2TPA ( $\text{CDCl}_3$ , 125 MHz)

b

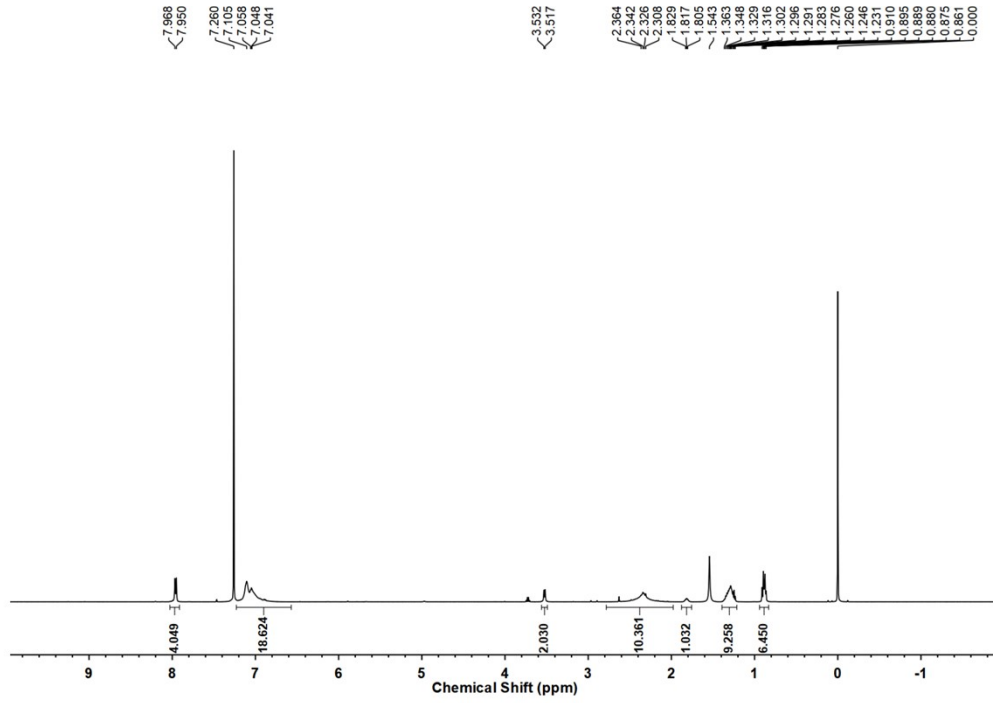

<sup>1</sup>H NMR spectrum of TPD-2TPA-4Me (CDCl<sub>3</sub>, 500 MHz)

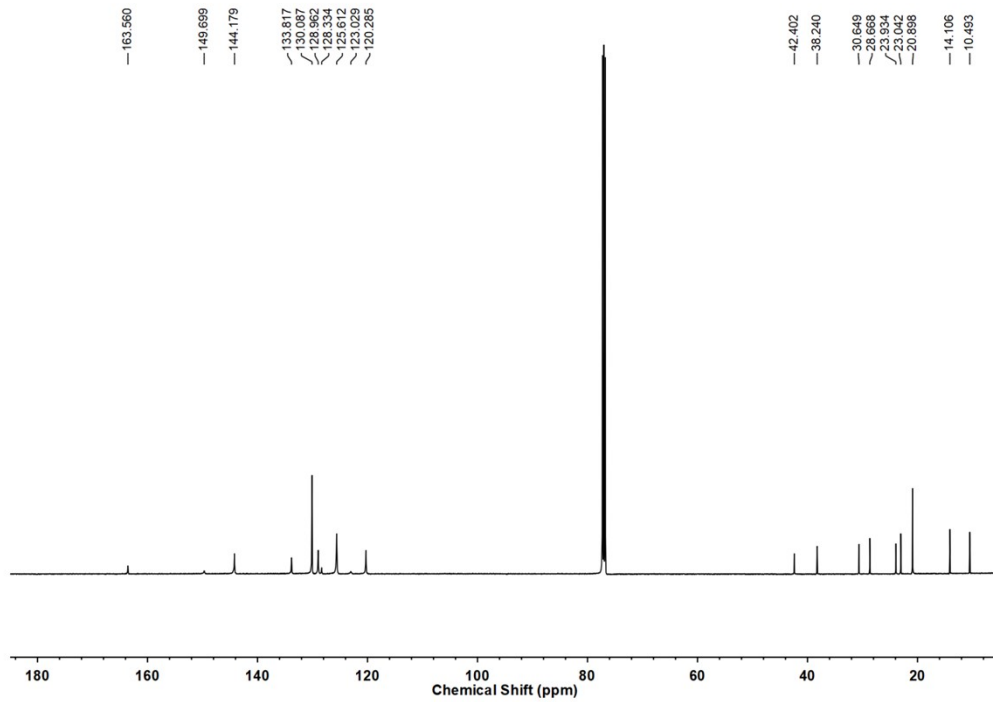

<sup>13</sup>C NMR spectrum of TPD-2TPA-4Me (CDCl<sub>3</sub>, 125 MHz)

C

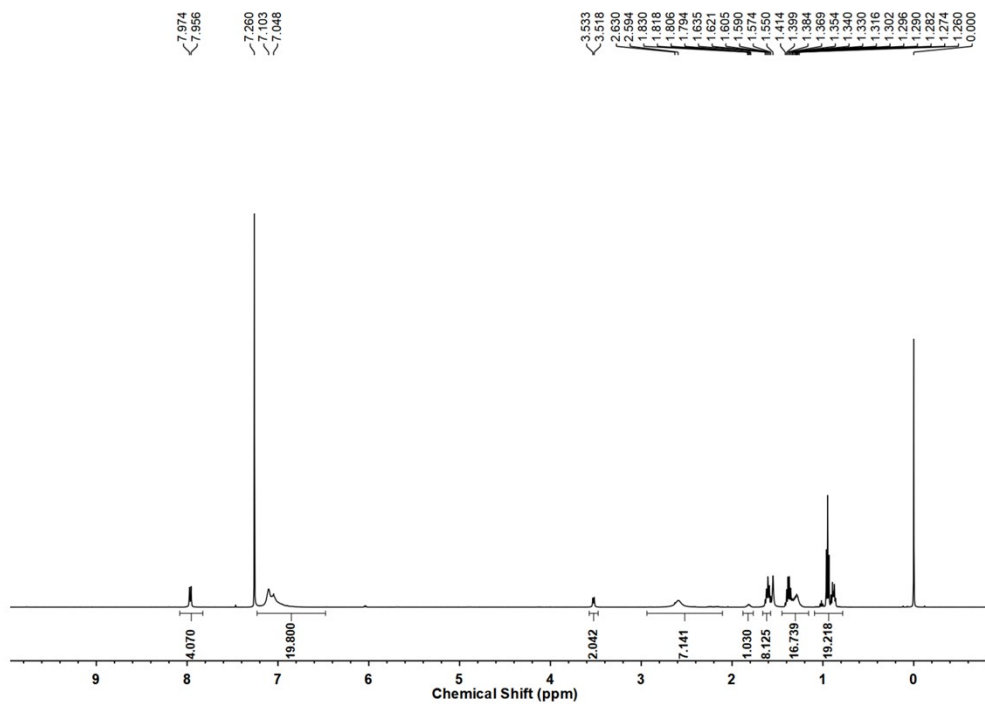

<sup>1</sup>H NMR spectrum of TPD-2TPA-4Bu (CDCl<sub>3</sub>, 500 MHz)

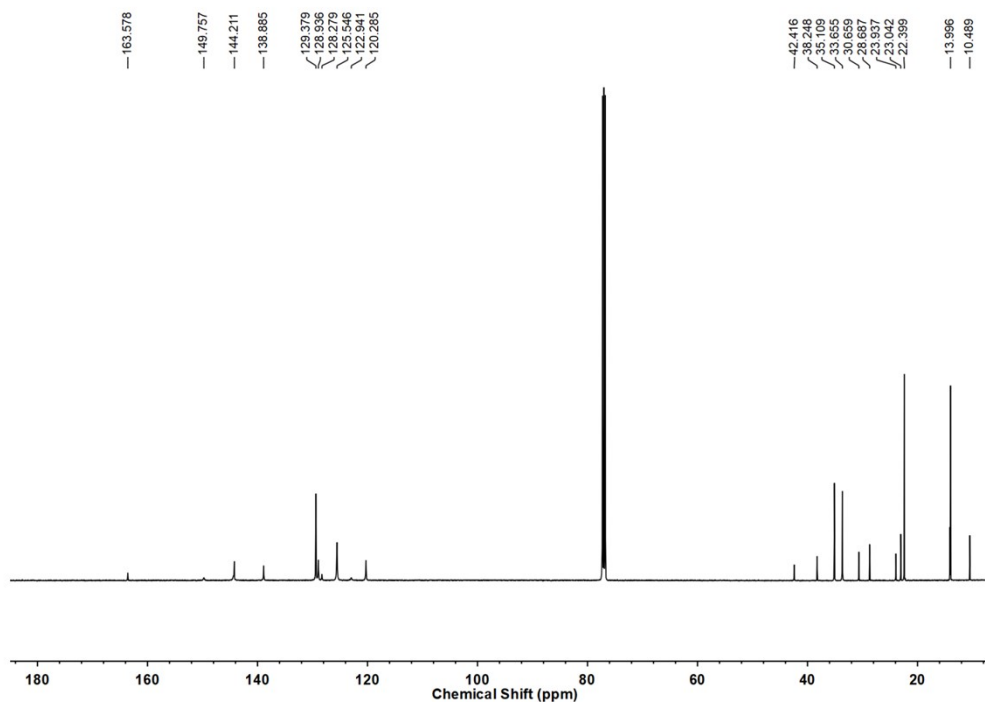

<sup>13</sup>C NMR spectrum of TPD-2TPA-4Bu (CDCl<sub>3</sub>, 125 MHz)

d

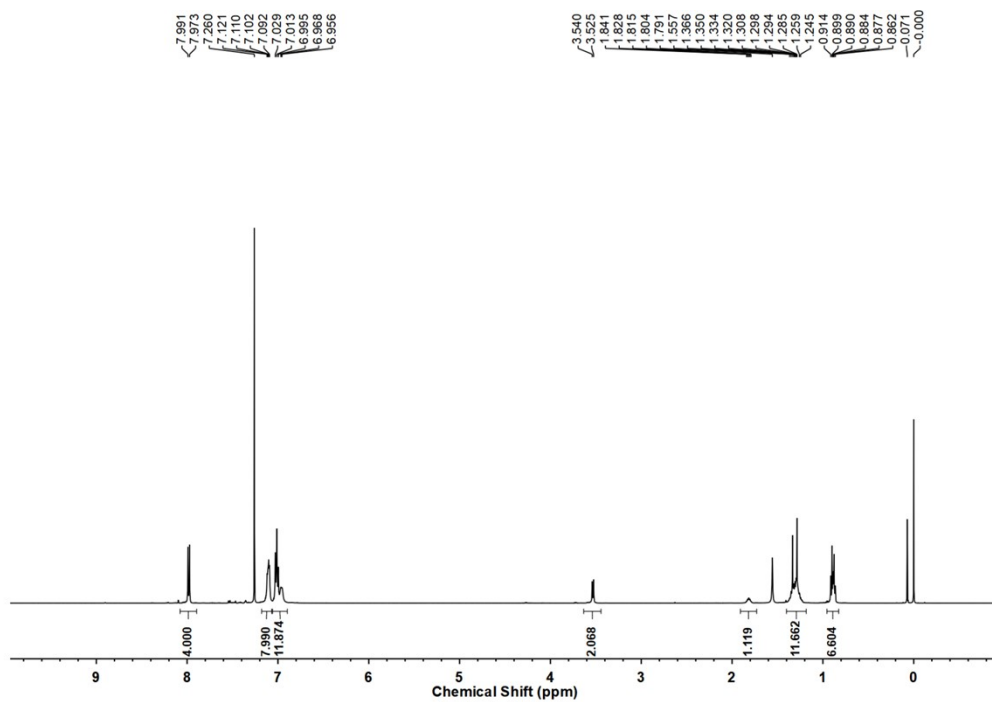

<sup>1</sup>H NMR spectrum of TPD-2TPA-4F (CDCl<sub>3</sub>, 500 MHz)

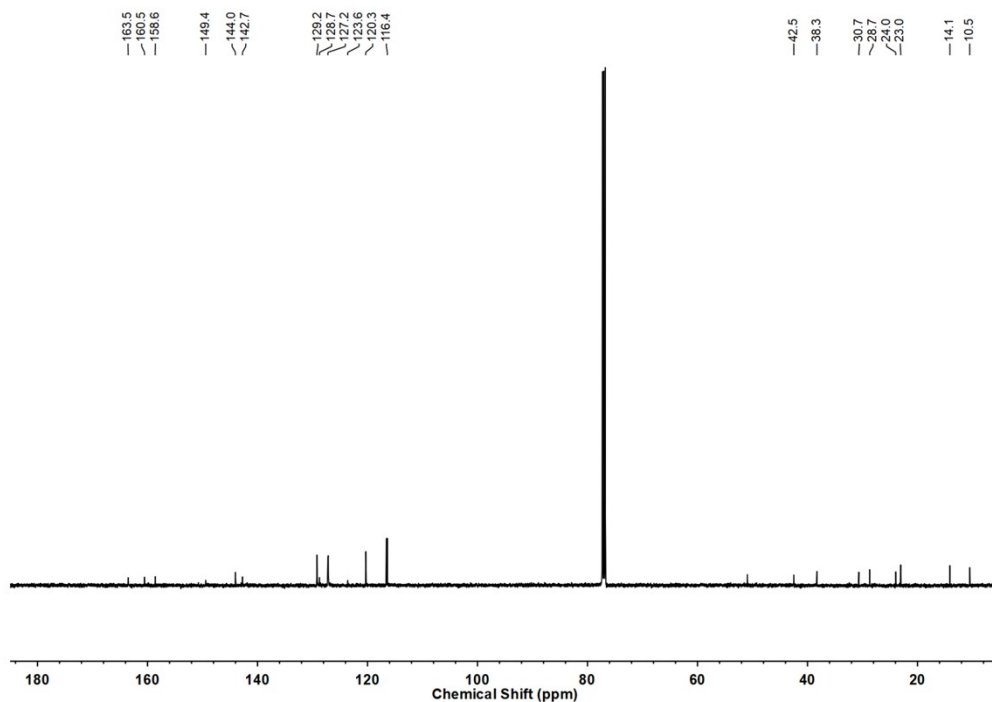

<sup>13</sup>C NMR spectrum of TPD-2TPA-4F (CDCl<sub>3</sub>, 125 MHz)

**Figure S1.** NMR spectra of the TPD-2TPA (a), TPD-2TPA-4Me (b), TPD-2TPA-4Bu (c) and TPD-2TPA-4F (d) in CDCl<sub>3</sub>.

a

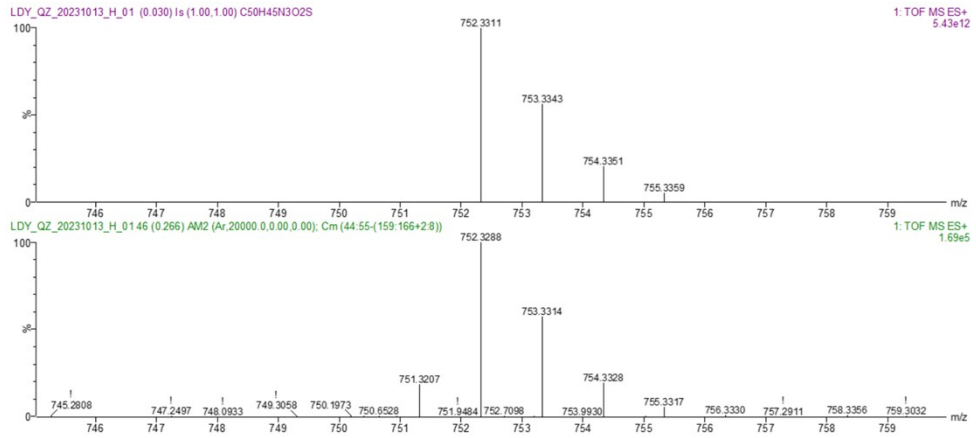

b

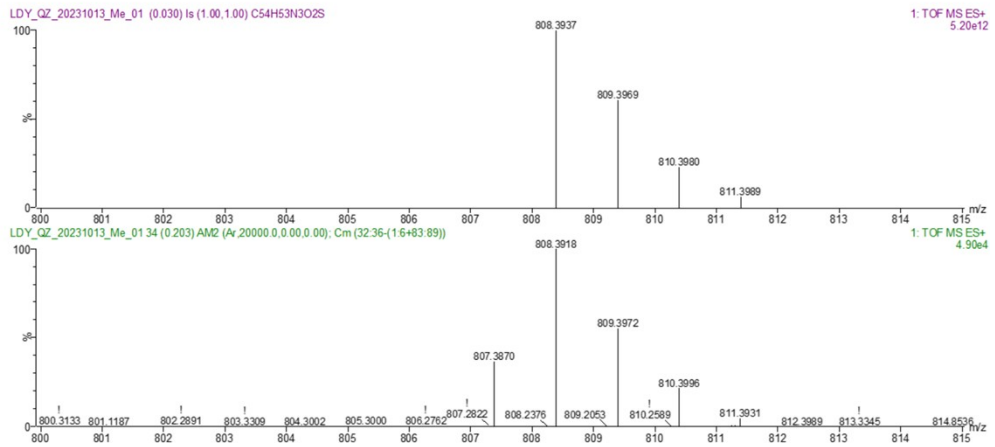

c

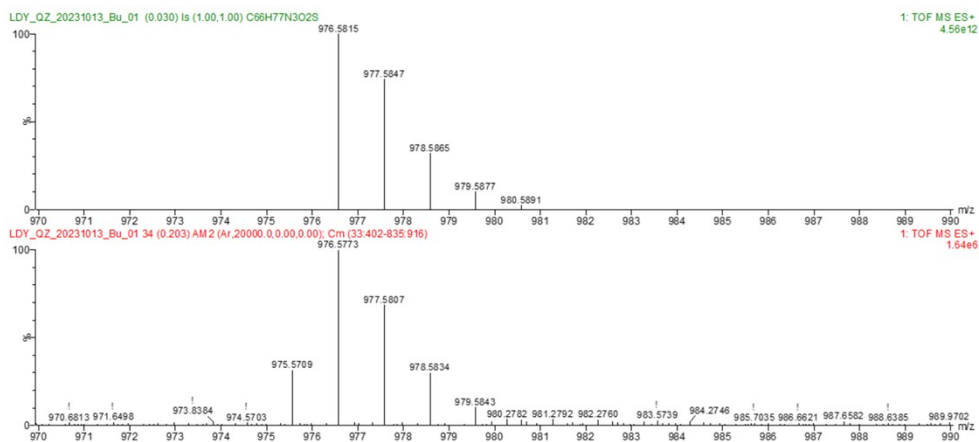

d

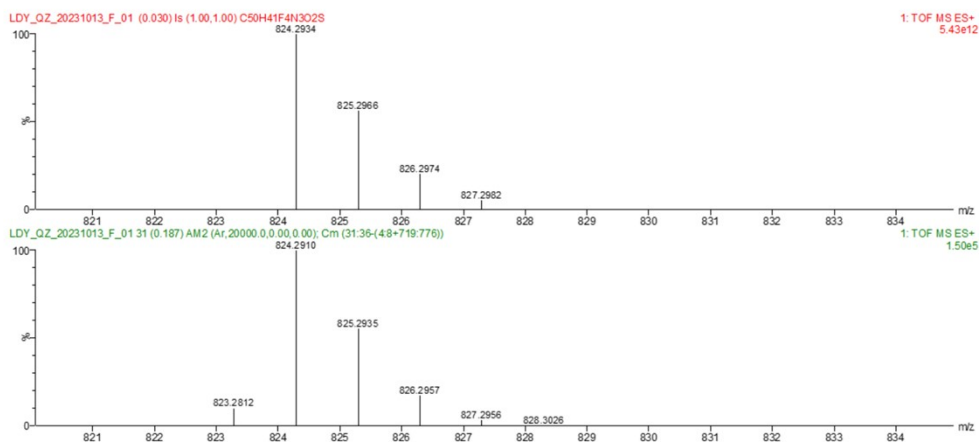

**Figure S2.** HR-MS (ESI) spectra of the TPD-2TPA (a), TPD-2TPA-4Me (b), TPD-2TPA-4Bu (c) and TPD-2TPA-4F (d).

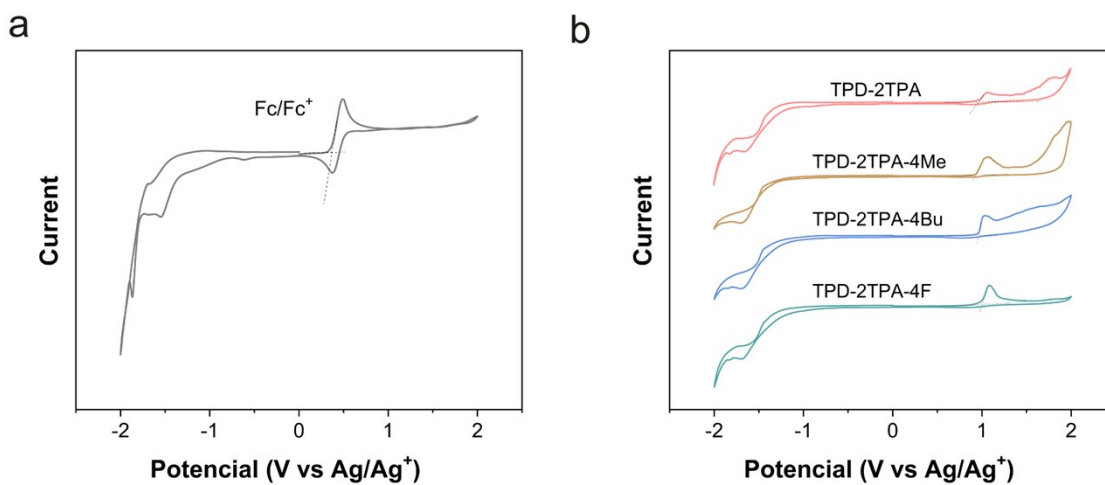

**Figure S3.** Cyclic voltammograms (CV) ( $20 \text{ mV s}^{-1}$ ) of TPD-2TPA-4X (Ag/AgCl as reference electrode).

**Table S1.** HOMO/LUMO energies related data of TPD-2TPA-4X.

| Sample       | $E_{\text{ox}}$ (eV) | $E_{\text{HOMO}}$ (eV) | $E_{\text{g}}^{\text{opt}}$ (eV) | $E_{\text{LUMO}}$ (eV) |
|--------------|----------------------|------------------------|----------------------------------|------------------------|
| TPD-2TPA     | 0.98                 | -5.41                  | 2.48                             | -2.93                  |
| TPD-2TPA-4Me | 0.93                 | -5.36                  | 2.44                             | -2.92                  |
| TPD-2TPA-4Bu | 0.94                 | -5.37                  | 2.43                             | -2.94                  |
| TPD-2TPA-4F  | 1.00                 | -5.43                  | 2.51                             | -2.92                  |



**Table S2.** Opaque device performances with various SVA durations for active layers.

| SVA   | Temperature | $V_{OC}$ (V) | $J_{SC}/J_{EQE}$ ( $\text{mA}\cdot\text{cm}^{-2}$ ) | FF (%) | PCE (%) |
|-------|-------------|--------------|-----------------------------------------------------|--------|---------|
| 0 s   | R.T.        | 0.850        | 8.72/7.77                                           | 38.0   | 2.82    |
| 10 s  | R.T.        | 0.840        | 11.5/10.8                                           | 41.8   | 4.04    |
| 30 s  | R.T.        | 0.815        | 17.2/17.8                                           | 44.2   | 6.20    |
| 1 min | R.T.        | 0.813        | 17.4/17.0                                           | 44.4   | 6.29    |
| 2 min | R.T.        | 0.822        | 14.6/14.2                                           | 43.4   | 5.19    |

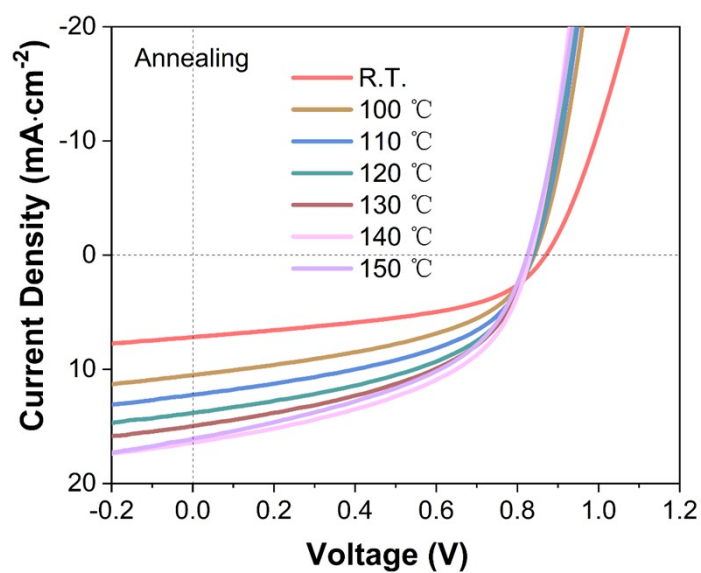

**Figure S4.**  $J$ - $V$  curves of opaque devices with different annealing temperatures for active layers.

**Table S3.** Opaque device performances with different annealing temperatures for active layers.

| Anneal | $V_{OC}$ (V) | $J_{SC}$ ( $\text{mA} \cdot \text{cm}^{-2}$ ) | FF (%) | PCE (%) |
|--------|--------------|-----------------------------------------------|--------|---------|
| R.T.   | 0.869        | 7.18                                          | 48.4   | 3.02    |
| 100 °C | 0.841        | 10.5                                          | 46.7   | 4.12    |
| 110 °C | 0.837        | 12.2                                          | 47.8   | 4.89    |
| 120 °C | 0.836        | 13.8                                          | 48.5   | 5.59    |
| 130 °C | 0.831        | 14.9                                          | 48.0   | 5.96    |
| 140 °C | 0.832        | 16.4                                          | 48.1   | 6.56    |
| 150 °C | 0.823        | 16.1                                          | 46.1   | 6.10    |

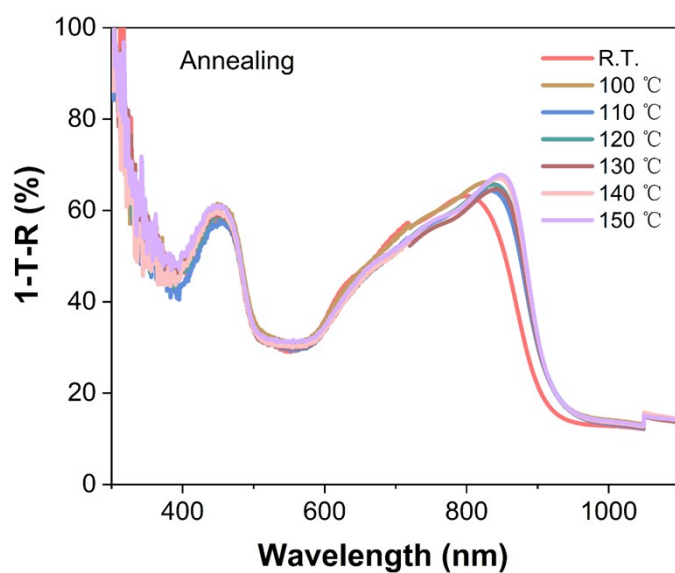

**Figure S5.** 1-T-R curves of active layers with different annealing temperatures.

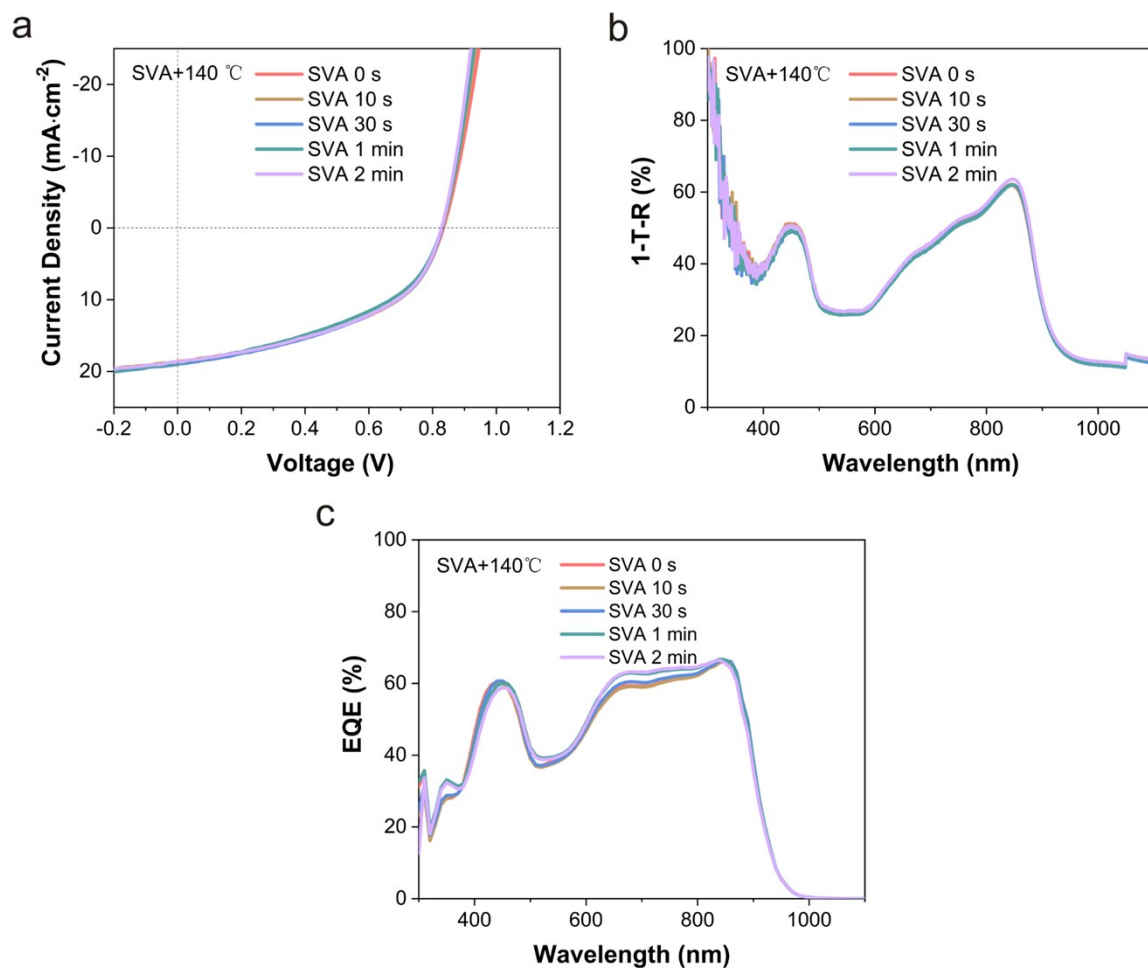

**Figure S6. Opaque device performances with various SVA durations and thermal annealing.** (a)  $J$ - $V$  curves of devices. (b) 1-T-R spectra of related films. (c) External quantum efficiency curves of devices.

**Table S4.** Device performances with SVA and thermal annealing for active layers.

| SVA   | Temperature | $V_{OC}$ (V) | $J_{SC}/J_{EQE}$ (mA·cm <sup>-2</sup> ) | FF (%) | PCE (%) |
|-------|-------------|--------------|-----------------------------------------|--------|---------|
| 0 s   | 140 °C      | 0.833        | 18.7/18.5                               | 47.2   | 7.34    |
| 10 s  | 140 °C      | 0.830        | 18.6/18.4                               | 47.5   | 7.31    |
| 30 s  | 140 °C      | 0.828        | 18.9/18.7                               | 46.5   | 7.30    |
| 1 min | 140 °C      | 0.827        | 18.8/19.1                               | 44.8   | 6.96    |
| 2 min | 140 °C      | 0.827        | 18.6/18.9                               | 47.3   | 7.28    |

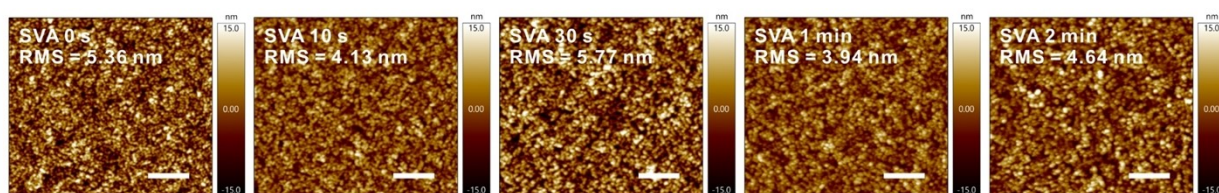

**Figure S7.** AFM images of TPD-2TPA:Y6 films with various SVA durations and thermal annealing (The scale bar is 1 μm).

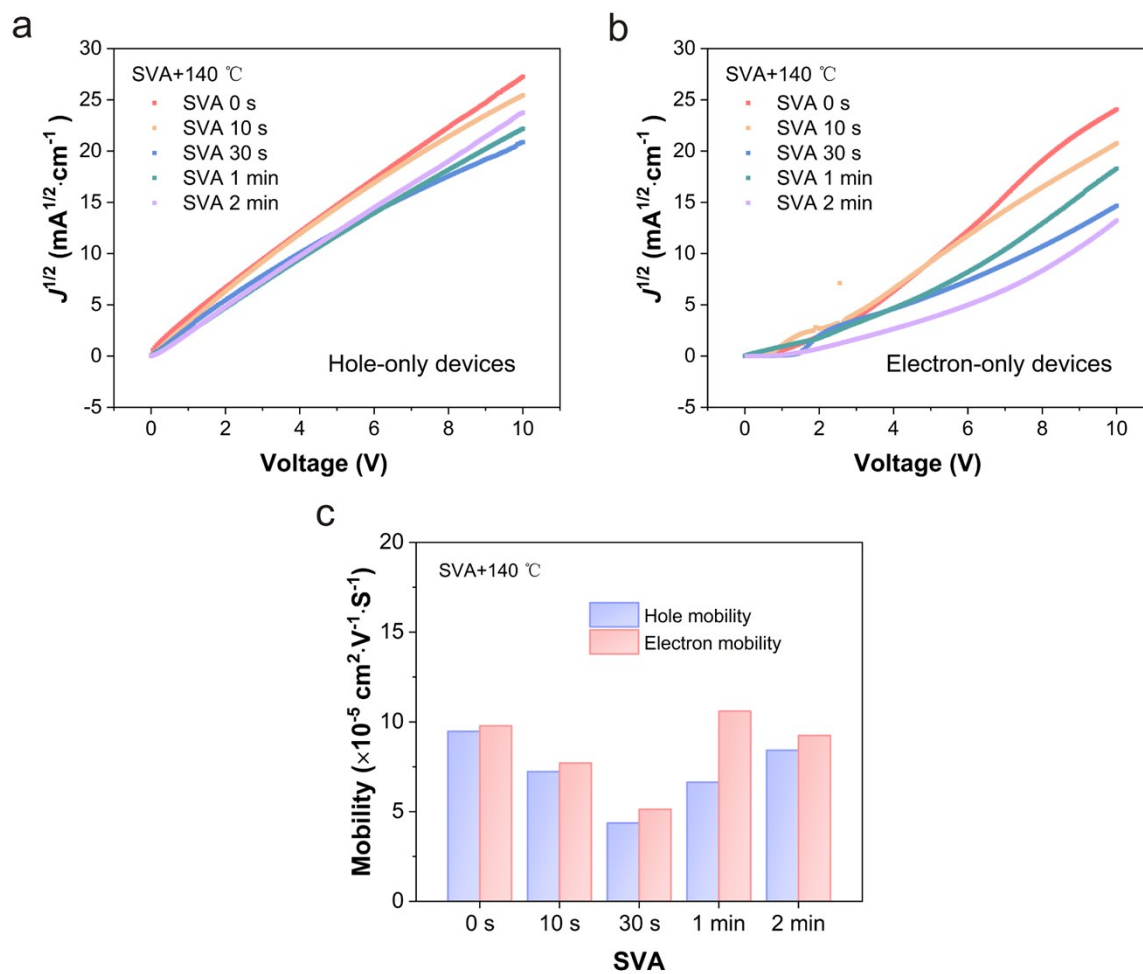

**Figure S8. Opaque device performances with various SVA durations and thermal annealing.** The  $J$ - $V$  characteristics of hole-only devices (a) and electron-only devices (b). (c) Carrier mobilities acquired from single carrier devices.

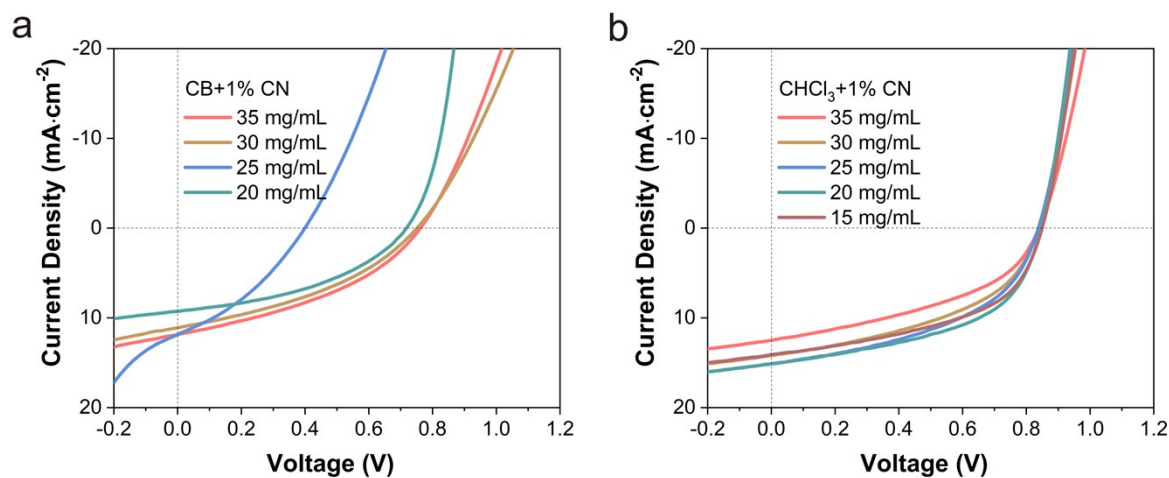

**Figure S9.**  $J$ - $V$  curves of devices with different solvents and total concentration for active layers.

**Table S5.** Device performances with different solvents and total concentrations for active layers.

| Solvent         | Concentration | $V_{OC}$ (V) | $J_{SC}$ ( $\text{mA}\cdot\text{cm}^{-2}$ ) | FF (%) | PCE (%) |
|-----------------|---------------|--------------|---------------------------------------------|--------|---------|
| CB              | 35 mg/mL      | 0.760        | 11.8                                        | 38.7   | 3.48    |
|                 | 30 mg/mL      | 0.749        | 11.1                                        | 38.0   | 3.16    |
|                 | 25 mg/mL      | 0.399        | 11.9                                        | 34.5   | 1.63    |
|                 | 20 mg/mL      | 0.716        | 9.26                                        | 41.9   | 2.78    |
| $\text{CHCl}_3$ | 35 mg/mL      | 0.839        | 12.5                                        | 43.1   | 4.51    |
|                 | 30 mg/mL      | 0.838        | 14.2                                        | 45.8   | 5.44    |
|                 | 25 mg/mL      | 0.836        | 15.1                                        | 47.1   | 5.94    |
|                 | 20 mg/mL      | 0.845        | 15.1                                        | 51.1   | 6.53    |
|                 | 15 mg/mL      | 0.848        | 14.1                                        | 50.1   | 6.00    |

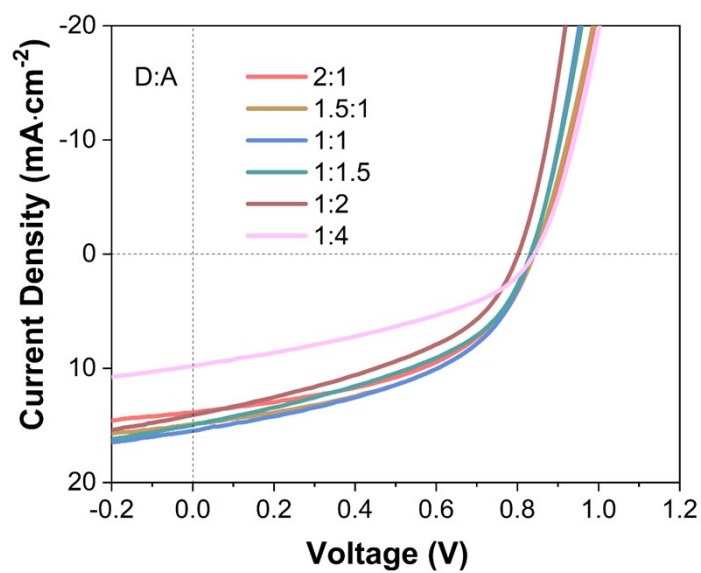

**Figure S10.**  $J$ - $V$  curves of devices with different D-A ratios for active layers.

**Table S6.** Device performances with different D-A ratios for active layers.

| D:A   | $V_{OC}$ (V) | $J_{SC}$ (mA·cm <sup>-2</sup> ) | FF (%) | PCE (%) |
|-------|--------------|---------------------------------|--------|---------|
| 2:1   | 0.839        | 13.8                            | 48.9   | 5.67    |
| 1.5:1 | 0.840        | 14.9                            | 48.3   | 6.03    |
| 1:1   | 0.832        | 15.4                            | 46.9   | 6.03    |
| 1:1.5 | 0.830        | 14.9                            | 43.9   | 5.44    |
| 1:2   | 0.800        | 14.1                            | 42.5   | 4.79    |
| 1:4   | 0.839        | 9.78                            | 39.3   | 3.22    |

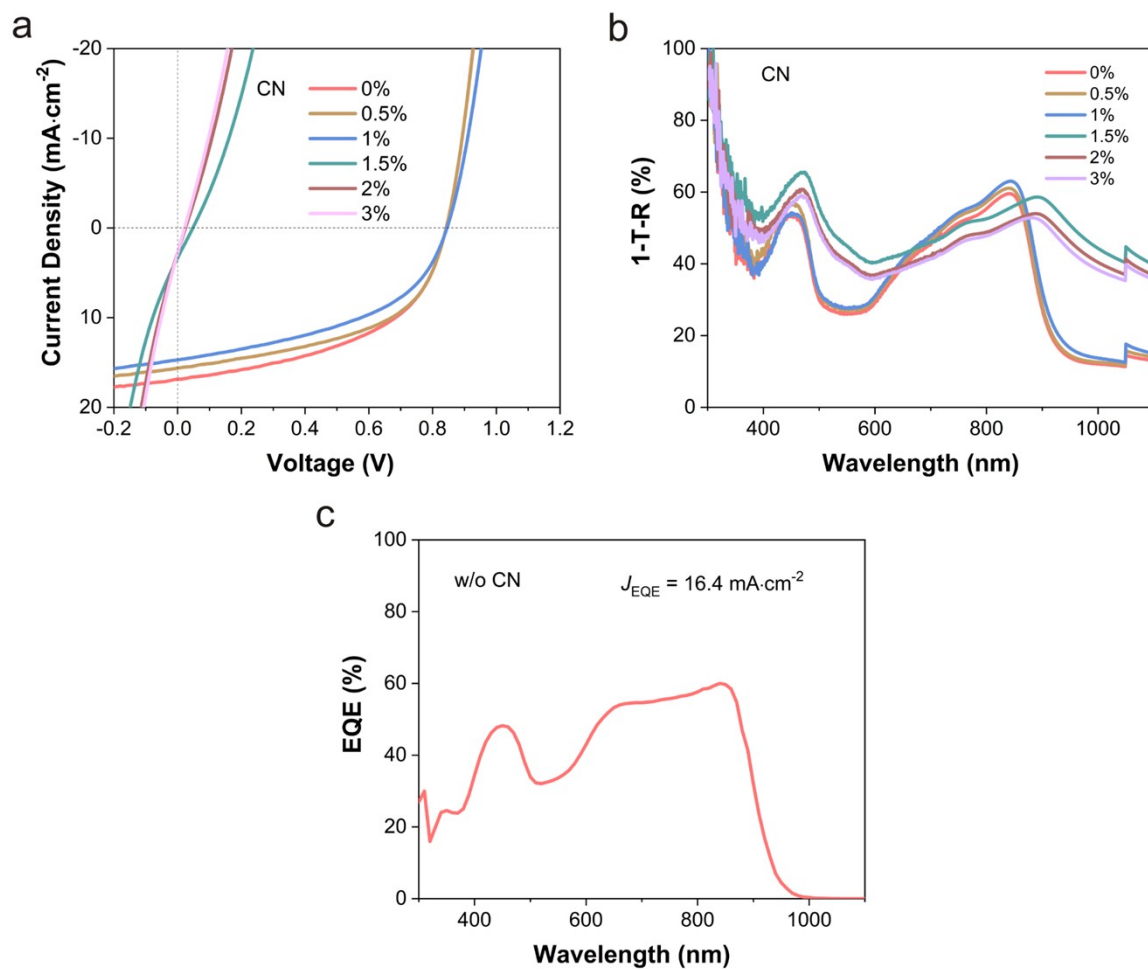

**Figure S11.**  $J$ - $V$  (a) and 1-T-R (b) curves of devices with different amounts of chloronaphthalene (CN) additive in active layers. (c) EQE curve of the device without CN.



**Table S7.** Device performances with different amounts of CN additive in active layers.

| CN   | $V_{OC}$ (V) | $J_{SC}$ (mA·cm <sup>-2</sup> ) | FF (%) | PCE (%) |
|------|--------------|---------------------------------|--------|---------|
| 0%   | 0.842        | 16.9                            | 49.6   | 7.04    |
| 0.5% | 0.842        | 15.6                            | 51.5   | 6.77    |
| 1%   | 0.844        | 14.7                            | 46.8   | 5.80    |
| 1.5% | 0.0478       | 3.34                            | 25.0   | 0.0400  |
| 2%   | 0.0248       | 2.76                            | NaN    | NaN     |
| 3%   | 0.0220       | 2.80                            | NaN    | NaN     |

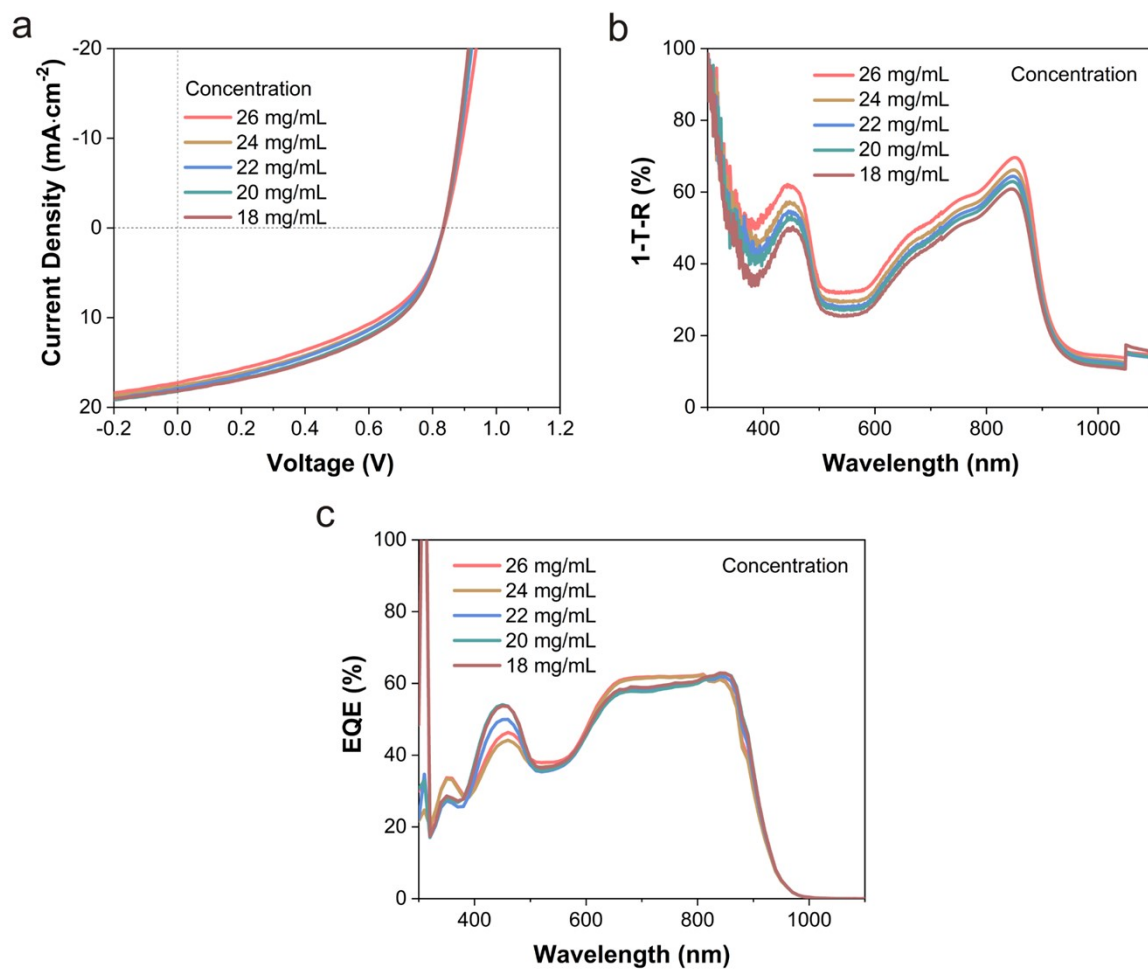

**Figure S12.**  $J-V$  (a), 1-T-R (b) and EQE (c) curves of devices with different total concentrations for active layers.

**Table S8.** Device performances with different total concentrations for active layers.

| Concentration | $V_{OC}$ (V) | $J_{SC}/J_{EQE}$ (mA·cm <sup>-2</sup> ) | FF (%) | PCE (%) |
|---------------|--------------|-----------------------------------------|--------|---------|
| 26 mg/mL      | 0.834        | 17.2/17.6                               | 44.8   | 6.43    |
| 24 mg/mL      | 0.833        | 17.6/17.4                               | 46.2   | 6.77    |
| 22 mg/mL      | 0.832        | 17.9/17.4                               | 45.9   | 6.83    |
| 20 mg/mL      | 0.833        | 18.1/17.6                               | 47.5   | 7.17    |
| 18 mg/mL      | 0.832        | 18.1/17.7                               | 48.6   | 7.32    |

**Table S9.** Device performances with different donors.

| Donor        | $V_{OC}$ (V) | $J_{SC}/J_{EQE}$ (mA·cm <sup>-2</sup> ) | FF (%) | PCE (%) |
|--------------|--------------|-----------------------------------------|--------|---------|
| TPD-2TPA     | 0.833        | 18.7/18.5                               | 47.2   | 7.34    |
| TPD-2TPA-4Me | 0.779        | 11.6/11.0                               | 48.6   | 4.40    |
| TPD-2TPA-4Bu | 0.765        | 16.8/15.2                               | 45.4   | 5.83    |
| TPD-2TPA-4F  | 0.843        | 1.91/1.47                               | 27.0   | 0.435   |

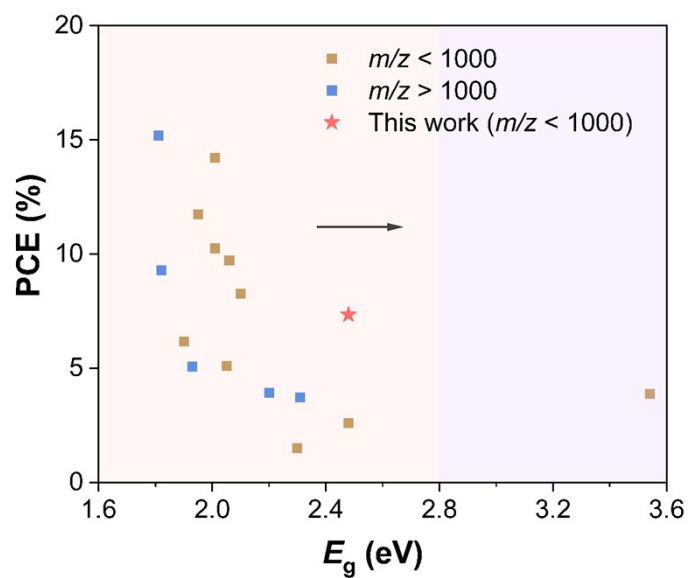

**Figure S13.** Performance statistics of small molecule donors with  $E_g$  over 1.80 eV in binary organic solar cells.

**Table S10.** Performance data statistics of small molecule donors with  $E_g$  over 1.80 eV in binary organic solar cells.

| $m/z$ of donor | No.              | Donor                      | Acceptor            | PCE (%) | $E_g$ of donor (eV) | $m/z$ of donor | Year      |
|----------------|------------------|----------------------------|---------------------|---------|---------------------|----------------|-----------|
|                | 1 <sup>1</sup>   | TT-TTPA                    | PC <sub>71</sub> BM | 3.73    | 2.31                | 1128.0         | 2012      |
|                | 2 <sup>2</sup>   | TPA(BT-3Cz) <sub>3</sub>   | PC <sub>71</sub> BM | 3.94    | 2.20                | 1478.2         | 2015      |
| $m/z > 1000$   | 3 <sup>2</sup>   | TPA(BT-T-3Cz) <sub>3</sub> | PC <sub>71</sub> BM | 5.07    | 1.93                | 1724.2         | 2015      |
|                | 4 <sup>3</sup>   | BTR                        | PC <sub>71</sub> BM | 9.30    | 1.82                | 2027.7         | 2015      |
|                | 5 <sup>4</sup>   | B3T-P                      | BO-4Cl              | 15.2    | 1.81                | 1857.1         | 2021      |
|                | 6 <sup>5</sup>   | D                          | A2 (12Cl-cHBC)      | 1.50    | 2.30                | 761.2          | 2017      |
|                | 7 <sup>6</sup>   | TPD-2TPA                   | PC <sub>71</sub> BM | 2.60    | 2.48                | 751.3          | 2017      |
|                | 8 <sup>7</sup>   | TAPC                       | Y6                  | 3.88    | 3.54                | 626.9          | 2021      |
|                | 9 <sup>8</sup>   | TPA-T-DCV-Ph               | C <sub>70</sub>     | 5.11    | 2.05                | 479.1          | 2018      |
| $m/z < 1000$   | 10 <sup>9</sup>  | M2                         | PC <sub>71</sub> BM | 6.18    | 1.90                | 630.3          | 2018      |
|                | 11 <sup>10</sup> | C1                         | BThIND-Cl           | 8.26    | 2.10                | 390.5          | 2021      |
|                | 12 <sup>10</sup> | C2                         | Y6                  | 9.72    | 2.06                | 514.6          | 2021      |
|                | 13 <sup>11</sup> | C1-CN                      | DBTBT-IC            | 10.3    | 2.01                | 438.2          | 2022      |
|                | 14 <sup>11</sup> | C2-CN                      | DBTBT-IC            | 11.7    | 1.95                | 562.2          | 2022      |
|                | 15 <sup>12</sup> | C1-CN                      | F13                 | 14.2    | 2.01                | 438.2          | 2023      |
|                | 16               | TPD-2TPA                   | Y6                  | 7.34    | 2.48                | 751.3          | This work |

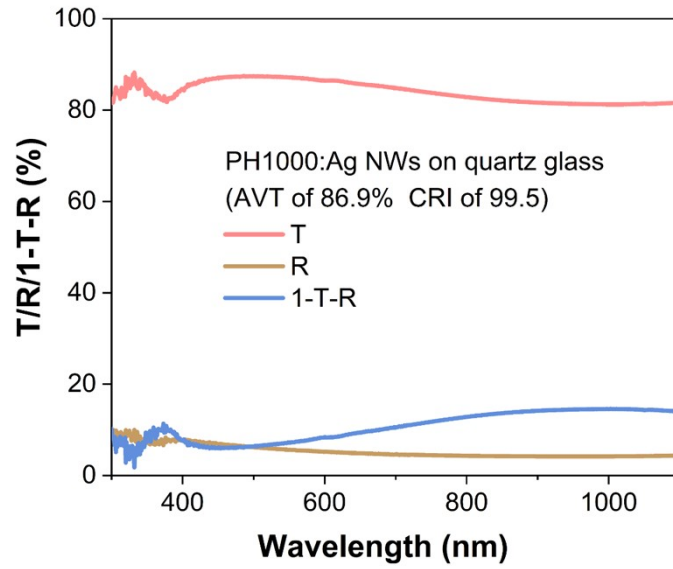

**Figure S14.** T/R spectra of the transparent electrode on quartz glass.

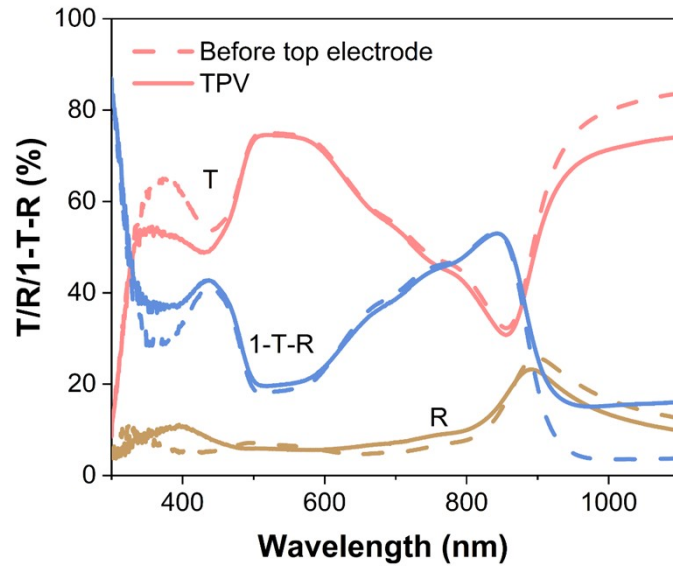

**Figure S15.** T/R spectra of the device before and after the top electrode with TPV AVT of 71.5%.

**Table S11.** Device performances with various SVA durations or thermal annealing for active layers (TPV AVT~70%).

| SVA   | Anneal | $V_{OC}$ (V) | $J_{SC}$ (mA·cm <sup>-2</sup> ) | FF (%) | PCE (%) |
|-------|--------|--------------|---------------------------------|--------|---------|
| 0 s   | R.T.   | 0.856        | 7.88                            | 36.7   | 2.48    |
| 10 s  | R.T.   | 0.825        | 10.7                            | 41.8   | 3.69    |
| 30 s  | R.T.   | 0.823        | 15.0                            | 46.5   | 5.75    |
| 40 s  | R.T.   | 0.804        | 16.1                            | 46.8   | 6.05    |
| 1 min | R.T.   | 0.804        | 15.6                            | 47.7   | 5.99    |
| 2 min | R.T.   | 0.798        | 16.2                            | 45.2   | 5.83    |
| 0 s   | 140 °C | 0.828        | 15.8                            | 47.9   | 6.26    |

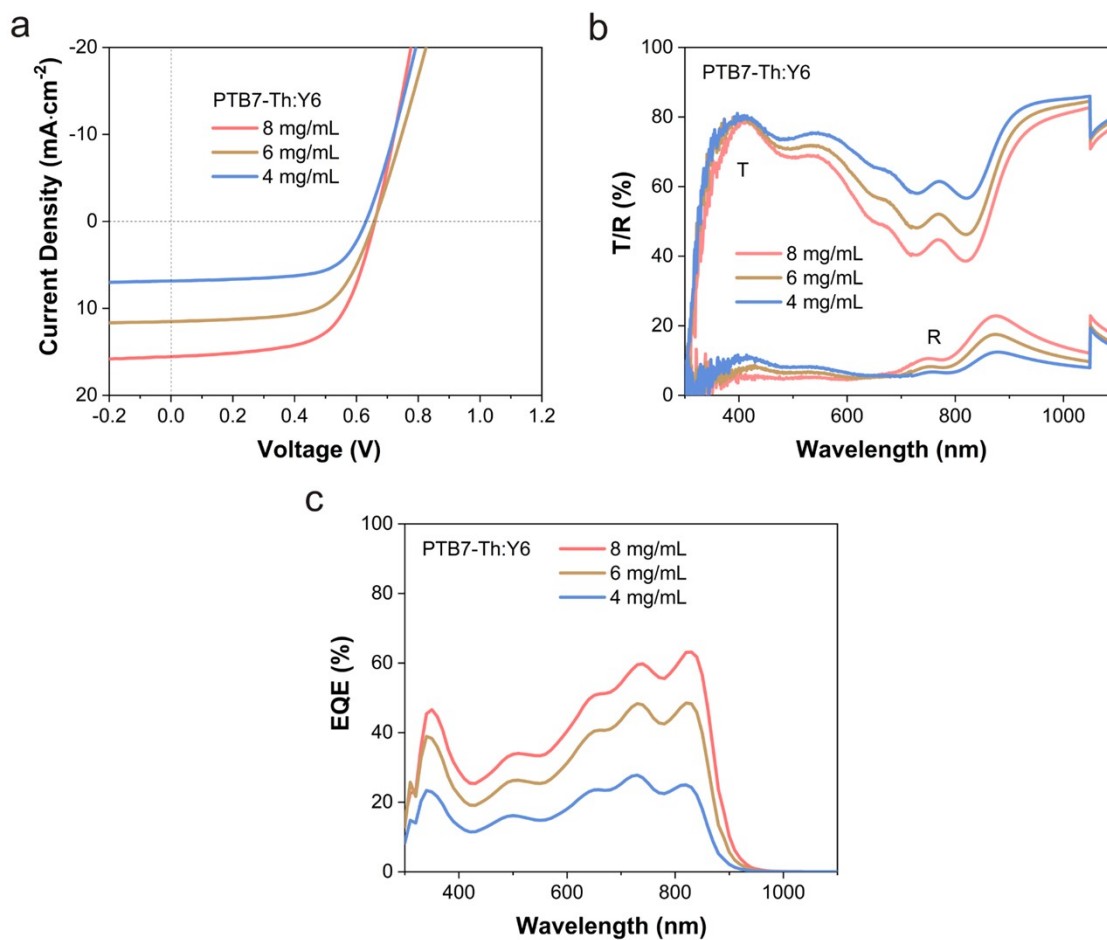

**Figure S16.** PTB7-Th:Y6-based opaque device performances.  $J$ - $V$  curves of devices (a), T/R spectra of related films (b) and EQE curves of devices (c) with different total concentrations for active layers.

**Table S12.** PTB7-Th:Y6-based opaque device performances with different total concentrations for active layers.

| Concentration | $V_{oc}$<br>(V) | $J_{sc}$<br>( $\text{mA}\cdot\text{cm}^{-2}$ ) | FF<br>(%) | PCE<br>(%) | AVT of<br>Film (%) | CRI of<br>Film |
|---------------|-----------------|------------------------------------------------|-----------|------------|--------------------|----------------|
| 8 mg/mL       | 0.660           | 15.5/14.9                                      | 62.4      | 6.39       | 64.8               | 86.4           |
| 6 mg/mL       | 0.657           | 11.5/11.5                                      | 63.5      | 4.80       | 68.8               | 90.4           |
| 4 mg/mL       | 0.631           | 6.85/6.40                                      | 65.0      | 2.81       | 73.4               | 94.5           |



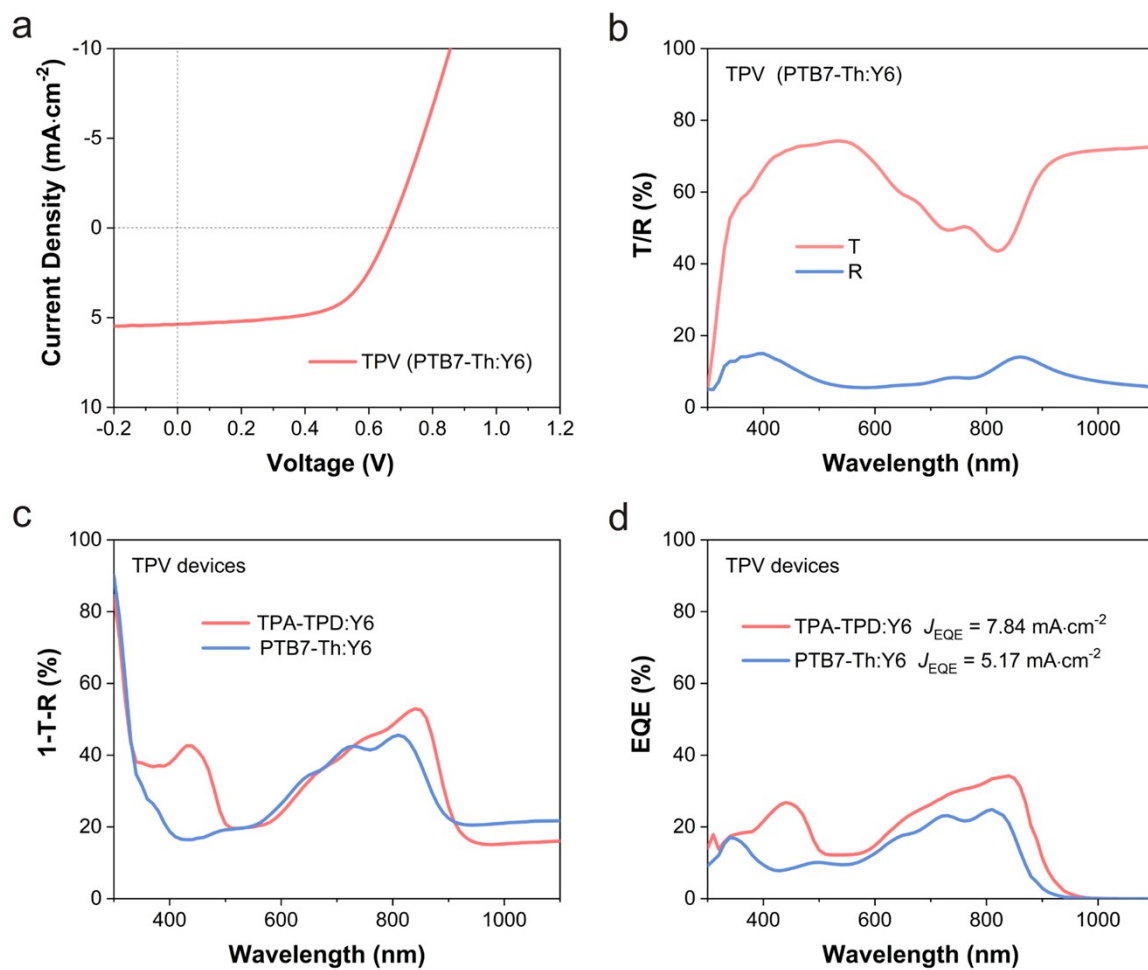

**Figure S17.**  $J$ - $V$  curve (a) and T/R spectra (b) for PTB7-Th:Y6-based TPV device with AVT of 71.1%. 1-T-R (c) and EQE (d) curves for the TPD-2TPA:Y6-based and PTB7-Th:Y6-based TPV device with AVT  $\sim 71\%$ .

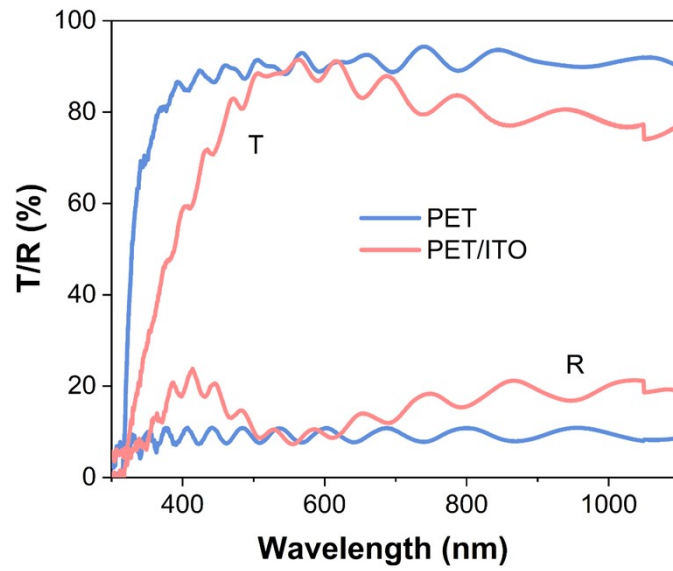

**Figure S18.** T/R properties for the flexible substrates.

**Table S13.** AVT and CRI values for the flexible substrates.

| Substrate | AVT (%) | CRI  |
|-----------|---------|------|
| PET       | 90.3    | 98.6 |
| PET/ITO   | 88.4    | 97.4 |

**Table S14.** Flexible opaque device performances with various SVA durations at room temperature (14 mg/mL).

| SVA   | $V_{OC}$ (V) | $J_{SC}$ (mA·cm <sup>-2</sup> ) | FF (%) | PCE (%) |
|-------|--------------|---------------------------------|--------|---------|
| 0 s   | 0.838        | 9.25                            | 36.4   | 2.83    |
| 10 s  | 0.827        | 11.0                            | 38.9   | 3.55    |
| 30 s  | 0.784        | 17.9                            | 37.3   | 5.25    |
| 40 s  | 0.755        | 16.9                            | 36.2   | 4.62    |
| 1 min | 0.759        | 14.7                            | 39.8   | 4.44    |
| 2 min | 0.0605       | 0.564                           | 24.7   | 0.0084  |

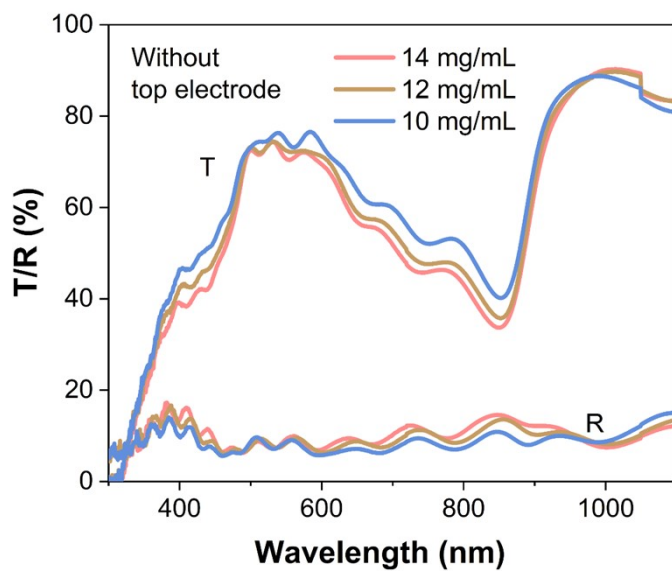

**Figure S19.** T/R spectra of the flexible samples before transferring the top electrodes with different concentrations for active layers.

**Table S15.** AVT and CRI values of the flexible samples before and after transferring the top electrodes with different concentrations for active layers.

| Concentration | Condition            | AVT (%) | CRI  |
|---------------|----------------------|---------|------|
| 14 mg/mL      | Before top electrode | 69.5    | 91.2 |
|               | TPV device           | 66.8    | 89.3 |
| 12 mg/mL      | Before top electrode | 70.7    | 92.4 |
|               | TPV device           | 68.3    | 90.0 |
| 10 mg/mL      | Before top electrode | 73.1    | 93.7 |
|               | TPV device           | 70.6    | 91.2 |

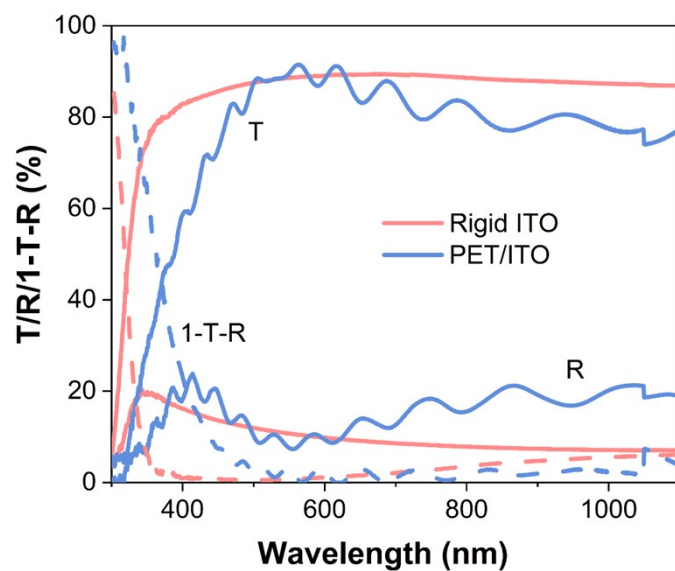

**Figure S20.** T/R/1-T-R spectra of the rigid ITO and flexible ITO substrates.

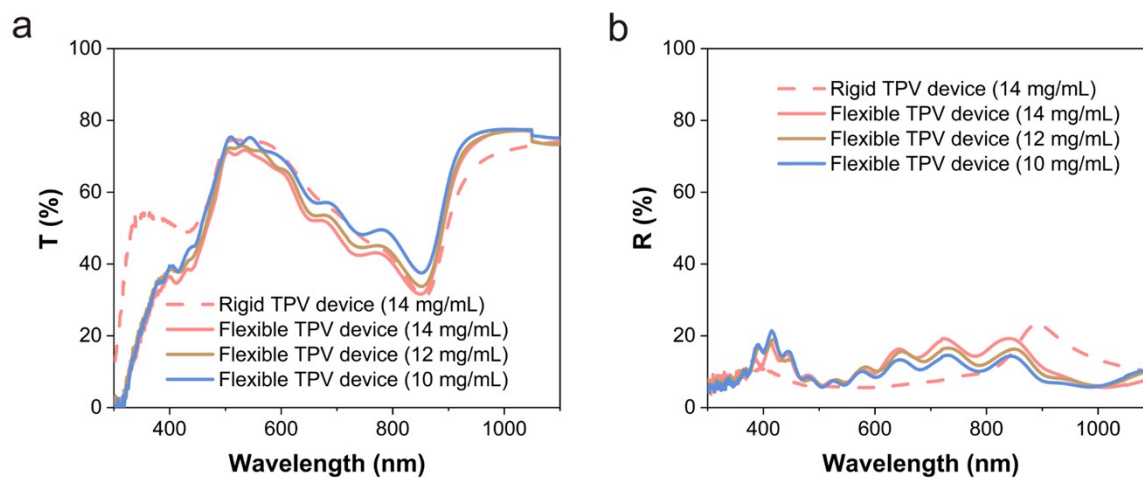

**Figure S21.** T (a) and R (b) spectra of the rigid TPV device and flexible TPV devices.

**Table S16.** Flexible TPV device performances with TPV AVT of 70.6%.

| Device       | $V_{OC}$ (V) | $J_{SC}/J_{EQE}$ (mA·cm <sup>-2</sup> ) | FF (%) | PCE (%) |
|--------------|--------------|-----------------------------------------|--------|---------|
| Flexible TPV | 0.828        | 6.94/6.93                               | 41.6   | 2.39    |

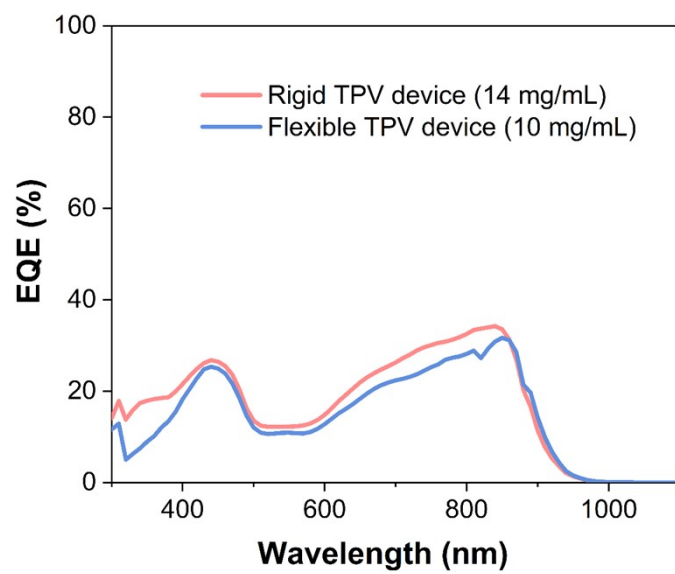

**Figure S22.** EQE curves of the rigid and flexible TPV device with TPV AVT around 70%.

**Table S17.** Performance data statistics of donors with  $E_g$  over 2.20 eV in binary organic solar cells.

| No.             | Donor                    | Acceptor            | PCE (%) | $E_g$ of donor (eV) | $m/z$ of donor | Year      |
|-----------------|--------------------------|---------------------|---------|---------------------|----------------|-----------|
| 1 <sup>5</sup>  | D                        | A2 (12Cl-cHBC)      | 1.50    | 2.30                | 761.2          | 2017      |
| 2 <sup>13</sup> | PTAA                     | Y6                  | 2.29    | 2.95                | /              | 2022      |
| 3 <sup>6</sup>  | TPD-2TPA                 | PC <sub>71</sub> BM | 2.60    | 2.48                | 751.3          | 2017      |
| 4 <sup>7</sup>  | TAPC                     | Y6                  | 3.88    | 3.54                | 626.9          | 2021      |
| 5 <sup>2</sup>  | TPA(BT-3Cz) <sub>3</sub> | PC <sub>71</sub> BM | 3.94    | 2.20                | 1478.2         | 2015      |
| 6 <sup>13</sup> | PF8TAA                   | Y6                  | 4.76    | 2.87                | /              | 2022      |
| 7 <sup>13</sup> | PF8TAA-C6                | Y6                  | 5.56    | 2.87                | /              | 2022      |
| 8 <sup>13</sup> | PF8TAA-C12               | Y6                  | 6.07    | 2.87                | /              | 2022      |
| 9               | TPD-2TPA                 | Y6                  | 7.34    | 2.48                | 751.3          | This work |

## REFERENCES

1. Q. Shi, P. Cheng, Y. Li and X. Zhan, *Adv. Energy Mater.*, 2012, **2**, 63-67.
2. P. Zhou, D. Dang, Q. Wang, X. Duan, M. Xiao, Q. Tao, H. Tan, R. Yang and W. Zhu, *J. Mater. Chem. A*, 2015, **3**, 13568-13576.
3. K. Sun, Z. Xiao, S. Lu, W. Zajaczkowski, W. Pisula, E. Hanssen, J. M. White, R. M. Williamson, J. Subbiah, J. Ouyang, A. B. Holmes, W. W. Wong and D. J. Jones, *Nat. Commun.*, 2015, **6**, 6013.
4. C. An, Y. Qin, T. Zhang, Q. Lv, J. Qin, S. Zhang, C. He, H. Ade and J. Hou, *J. Mater. Chem. A*, 2021, **9**, 13653-13660.
5. N. C. Davy, M. Sezen-Edmonds, J. Gao, X. Lin, A. Liu, N. Yao, A. Kahn and Y.-L. Loo, *Nat. Energy*, 2017, **2**, 17104.
6. C. Garcias-Morales, D. Romero-Borja, J. L. Maldonado, A. E. Roa, M. Rodriguez, J. P. Garcia-Merinos and A. Ariza-Castolo, *Molecules*, 2017, **22**, 1607.
7. H. Tang, J. Wu, H. Liu, B. Wang, H. Wang, Y. Li, Y. Fu and Z. Xie, *Organic Electronics*, 2021, **93**, 106140.
8. O. V. Kozlov, Y. N. Luponosov, A. N. Solodukhin, B. Flament, O. Douhéret, P. Viville, D. Beljonne, R. Lazzaroni, J. Cornil, S. A. Ponomarenko and M. S. Pshenichnikov, *Org. Electron.*, 2018, **53**, 185-190.
9. S. Revoju, S. Biswas, B. Eliasson and G. D. Sharma, *Phys. Chem. Chem. Phys.*, 2018, **20**, 6390-6400.
10. R. Pradhan, H. Dahiya, B. P. Bag, M. L. Keshtov, R. Singhal, G. D. Sharma and A. Mishra, *J. Mater. Chem. A*, 2021, **9**, 1563-1573.
11. R. Pradhan, A. Agrawal, B. P. Bag, R. Singhal, G. D. Sharma and A. Mishra, *ACS Appl. Energy Mater.*, 2022, **5**, 9020-9030.
12. G. D. Sharma, R. Pradhan, K. Khandelwal, R. Singhal, W. Liu, X. Zhu and A. Mishra, *J. Mater. Chem. C*, 2023, **11**, 1919-1926.
13. Z. Du, Q. Xue, K. Zhang, Z. Hu, Z. Zhou, J. Jing, L. Shao, N. Li and F. Huang, *Solar RRL*, 2022, **6**, 2200527.
